# Supplementary material for: Genetic Differentiation and Evolutionary Adaptation inCryptomeria japonica
Source: Oxford University Press journal article supplement (doi:10.1534/g3.114.013896), 2014-10-16
Supplement: 013896_013896si.pdf [file 013896_013896si.pdf]

Genetic differentiation and evolutionary adaptation in *Cryptomeria japonica*

Yoshihiko Tsumura<sup>1</sup>, Kentaro Uchiyama<sup>1</sup>, Yoshinari Moriguchi<sup>2</sup>, Megumi K. Kimura<sup>1,3</sup>, Saneyoshi Ueno<sup>1</sup>  
and Tokuko Ujino-Ihara<sup>1</sup>

1: Department of Forest Genetics, Forestry and Forest Products Research Institute, Tsukuba Ibaraki 305-8687, Japan

2: Graduate School of Science and Technology, Niigata University, 8050, Igarashi 2-Nocho, Nishi-ku Niigata 950-2181, Japan.

3: Present address: Forest Tree Breeding Center, Forestry and Forest Products Research Institute, 3809-1, Ishi, Juo, Hitachi 319-1301, Japan

Address for corresponding author;

Yoshihiko Tsumura

Department of Forest Genetics, Forestry and Forest Products Research Institute, Tsukuba, Ibaraki 305-8687, Japan

Phone +81-29-829-8260

Fax +81-29-874-3720

E-mail; ytsumu@ffpri.affrc.go.jp

**DOI: 10.1534/g3.114.013896**

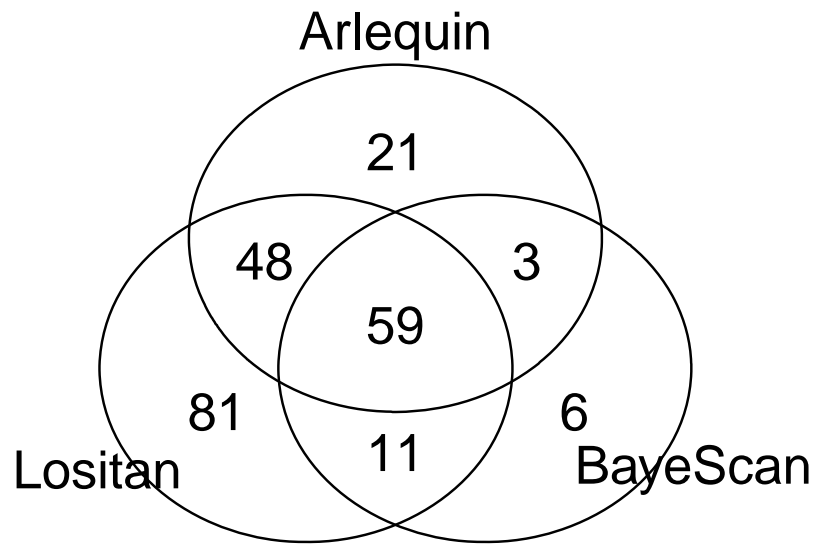

**Figure S1** Venn diagram of outlier loci detected by Lositan, Arlequin and BayeScan.

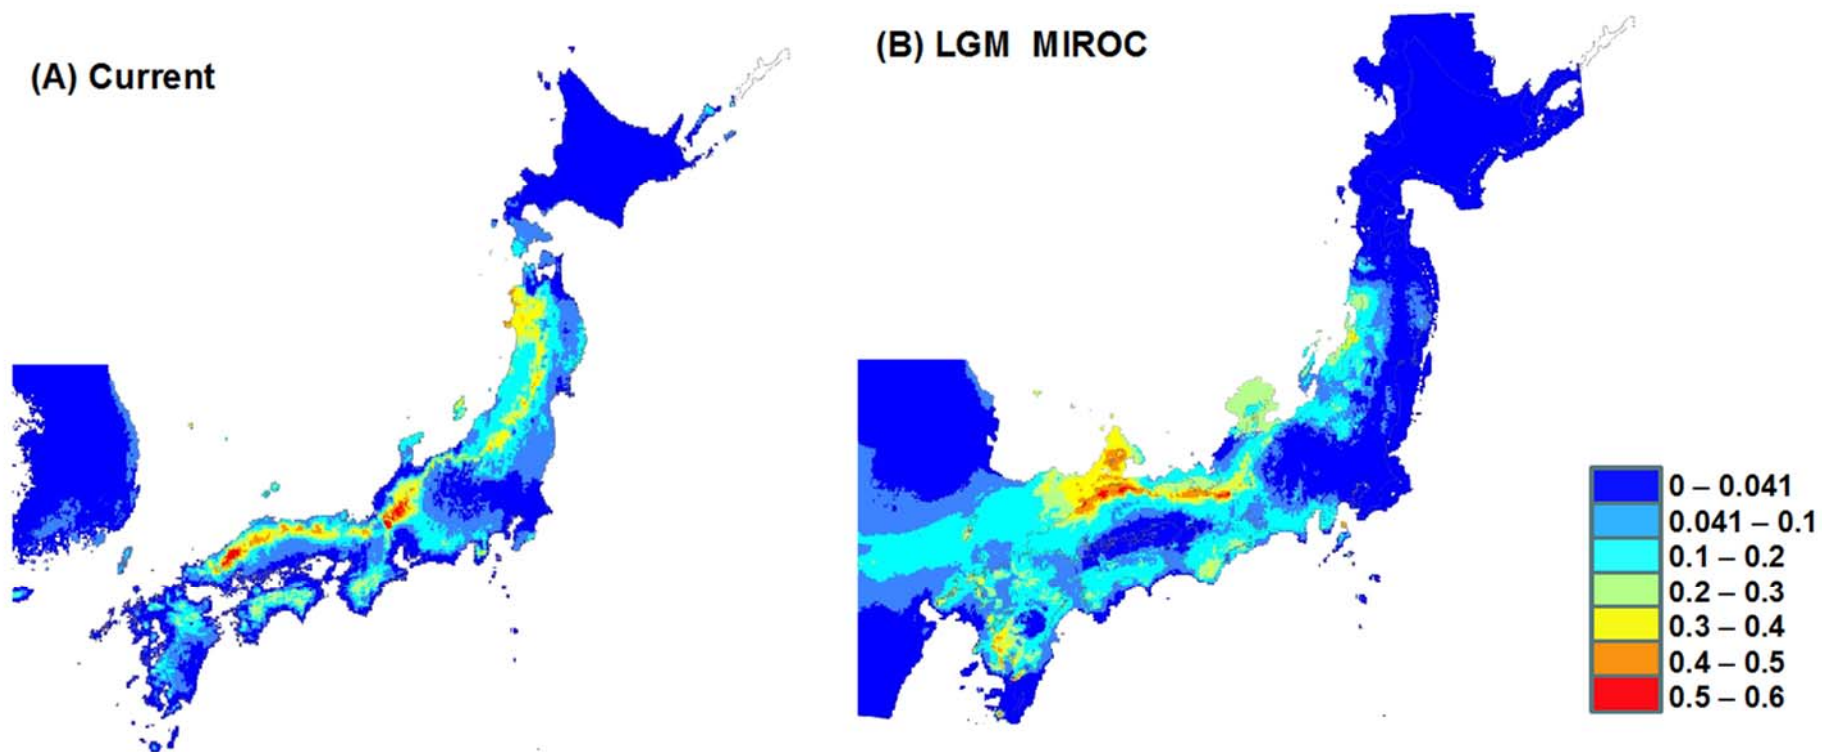

Figure S2 The estimated current and potential LGM natural distributions of *C. japonica*.

**Tables S1-S3**

Available for download as Excel files at <http://www.g3journal.org/lookup/suppl/doi:10.1534/g3.114.013896/-/DC1>

**Table S1** Outlier loci detected by Lositan and Bayscan ( $P < 0.01$ ).

**Table S2** Outlier loci detected in each variety group.

**Table S3** The results of Principal Component Analysis (PCA) of environmental variables.
