# Supplementary material for: Genetic Differentiation and Evolutionary Adaptation inCryptomeria japonica
Source: Oxford University Press journal article supplement (doi:10.1534/g3.114.013896), 2014-10-16
Supplement: 013896_figures1.pdf [file 013896_figures1.pdf]

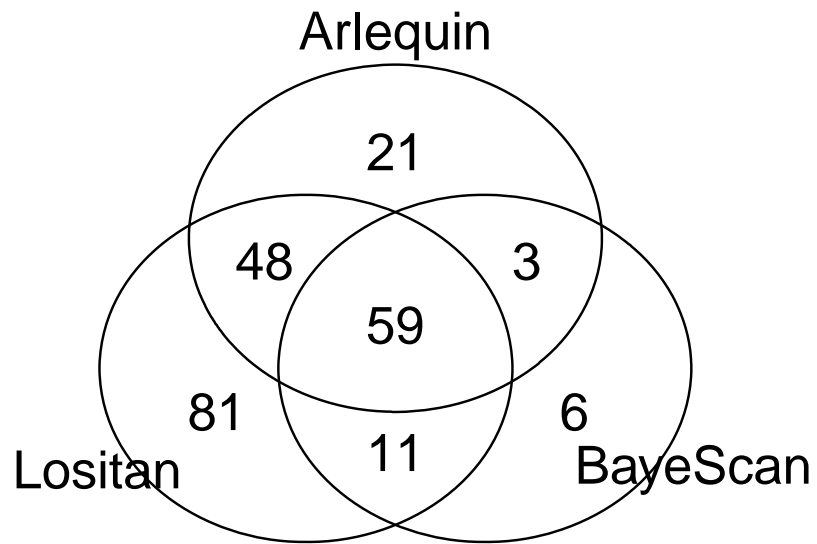

**Figure S1** Venn diagram of outlier loci detected by Lositan, Arlequin and BayeScan.
