# Supplementary material for: Genetic Differentiation and Evolutionary Adaptation inCryptomeria japonica
Source: Oxford University Press journal article supplement (doi:10.1534/g3.114.013896), 2014-10-16
Supplement: 013896_figures2.pdf [file 013896_figures2.pdf]

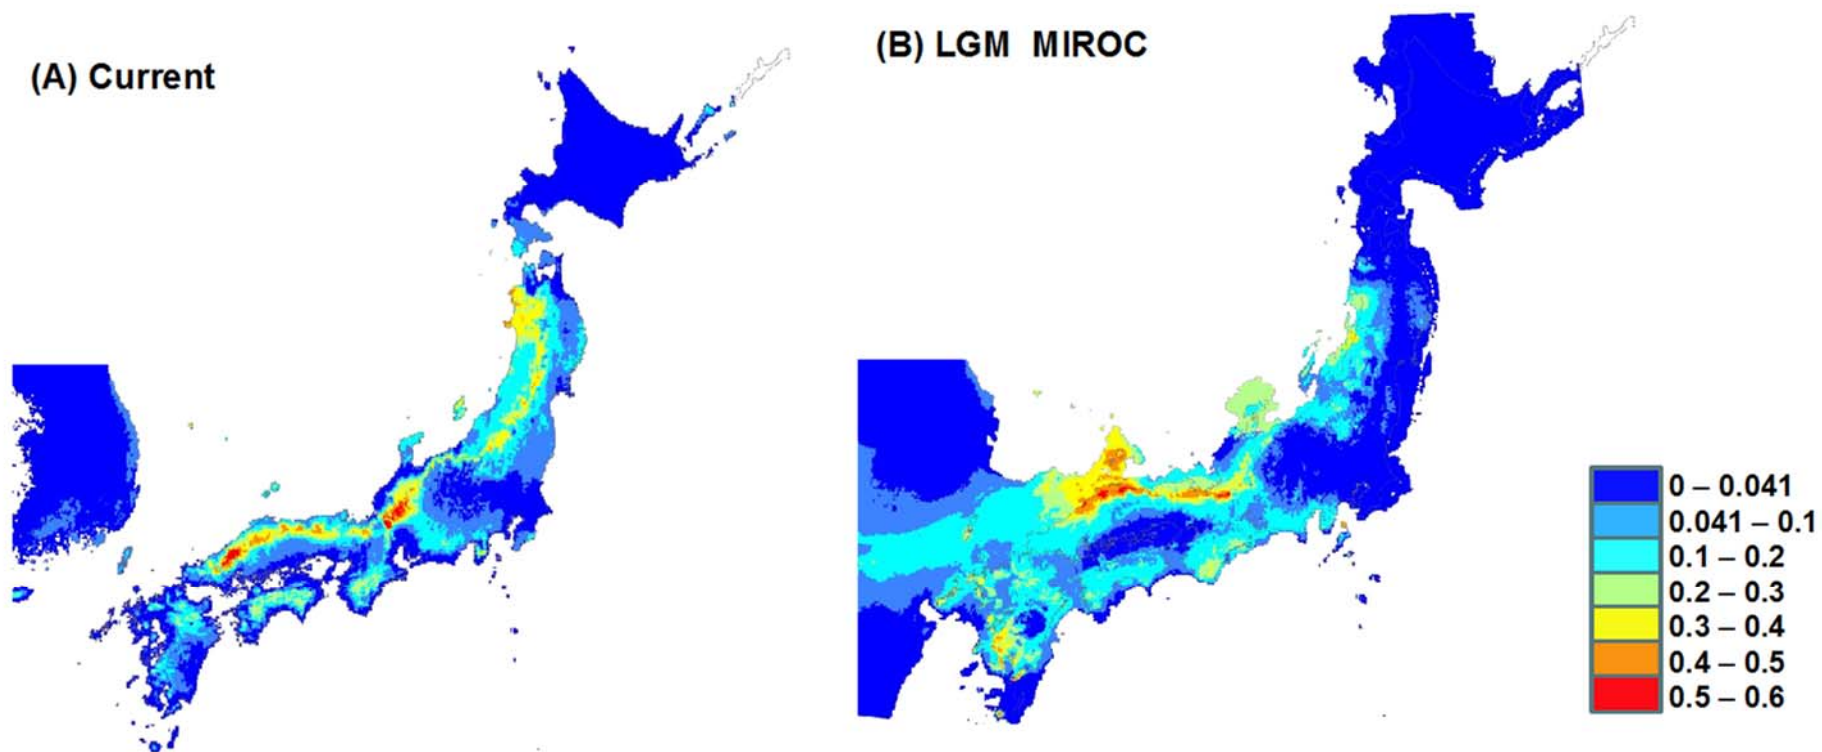

**Figure S2** The estimated current and potential LGM natural distributions of *C. japonica*.
