# Supplementary material for: Genetic Differentiation and Evolutionary Adaptation in Cryptomeria japonica
Source: G3 (Bethesda). 2014 Oct 14;4(12):2389–402. doi: 10.1534/g3.114.013896 (PMC4267934; doi:10.1534/g3.114.013896)
Supplement: Supporting Information [file supp_g3.114.013896_TableS1.xlsx]

## Sheet: SupplementalTable#1
Supplemental table1. Outlier loci detected by Lositan and Bayscan (P<0.01).
Locuｓ	Lositan			Bayscan				Linkage	Putative function deduced from best hit in NCBI database	Putative function deduced from best hit in TAIR10	E-value of
	Fst	P		Fst	P	log10(PO)	alpha	group			NCBI database
estSNP00015	0.161244	0.99898		0.15585	1	1000	1.5171	3	structural constituent of ribosome	Translation elongation	6.7e-52
estSNP00023	0.121579	0.996071						3	metallo-beta-lactamase family protein	metallo-beta-lactamase family protein	4e-169
estSNP00049	0.169076	0.99981						-	actin-depolymerizing factor 1-like	actin depolymerizing factor 8	2.4e-86
estSNP00073	0.139805	0.998716						-	unknown		1.6e-74
estSNP00091	0.197661	0.999973		0.21066	1	1000	1.9195	2	universal stress protein a-like protein	Adenine nucleotide alpha hydrolases-like superfamily protein	5.6e-82
estSNP00110	0.165713	0.999802		0.23817	1	1000	2.0943	-	phenylpropenal double-bond reductase	alkenal reductase	5.7e-149
estSNP00129	0.142119	0.999522						-	translationally controlled tumor protein	translationally controlled tumor protein	5.3e-91
estSNP00146	0.198832	1						7	reticulon-4-interacting protein mitochondrial-like	GroES-like zinc-binding alcohol dehydrogenase family protein	0
estSNP00178	0.187571	0.999875		0.2836	1	1000	2.3548	-	60s ribosomal protein l13a-4-like	Ribosomal protein L13 family protein	8.1e-125
estSNP00188	0.141316	0.998316						10	dead-box atp-dependent rna helicase 1-like	RNA helicase 1	5.7e-140
estSNP00213	0.140923	0.996925		0.23291	1	1000	2.0332	-	atp-dependent -nad h-hydrate dehydratase-like	pfkB-like carbohydrate kinase family protein	0
estSNP00268	0.155279	0.997854						-	branched-chain-amino-acid aminotransferase	branched-chain amino acid aminotransferase 5 / branched-chain amino acid transaminase 5 (BCAT5)	0
estSNP00292	0.15022	0.999569						6	adenylyl cyclase-associated protein	cyclase associated protein 1	3e-154
estSNP00322	0.136177	0.997511						-	t-complex protein 1 subunit theta-like	TCP-1/cpn60 chaperonin family protein	0
estSNP00328	0.192247	0.999896		0.1701	1	1000	1.6223	8	udp-glucose pyrophosphorylase	UDP-glucose pyrophosphorylase 2	0
estSNP00338	0.134155	0.999243		0.25766	1	1000	2.2037	-	protein proton gradient regulation chloroplastic-like	proton gradient regulation 5	2.8e-37
estSNP00402	0.233842	1		0.18526	1	1000	1.7424	1	50s ribosomal protein l9	ribosomal protein L9	2.7e-47
estSNP00407	0.12957	0.997199						-	phospholipid n-methyltransferase	phospholipid N-methyltransferase	2.2e-79
estSNP00428	0.148007	0.998095		0.17178	1	1000	1.6357	-	disease resistance gene	unknown protein; BEST Arabidopsis thaliana protein match is: unknown protein (TAIR:AT1G52140.1)	4.9e-96
estSNP00438	0.203164	0.99967						10	pinus taeda anonymous locus 0_17860_02 genomic sequence	heat shock transcription factor	4.9e-50
estSNP00454	0.162742	0.999997		0.17818	1	1000	1.6774	9	subtilisin-like protease-like	Proteinase inhibitor, propeptide	3.6e-43
estSNP00460	0.147384	0.999168		0.16706	1	1000	1.5953	-	diphosphoinositol polyphosphate	nudix hydrolase homolog 16	6.1e-48
estSNP00491	0.20236	0.998426						-	probable galactinol--sucrose galactosyltransferase 1-like	seed imbibition 1	0
estSNP00552	0.152451	0.999972						2	hypothetical protein	unknown protein	1e-56
estSNP00558	0.153864	0.999482		0.16518	1	1000	1.5898	2	transcription regulator		2.2e-12
estSNP00570	0.131769	0.998634						-	hypothetical protein PRUPE_ppa021262mg	unknown protein	7e-21
estSNP00608	0.122054	0.99547						1	dag chloroplastic-like	plastid developmental protein DAG, putative	2.5e-45
estSNP00609	0.168063	0.999874						-	cytochrome p450 716b1-like	cytochrome P450, family 716, subfamily A, polypeptide 1,member of CYP716A	3.7e-134
estSNP00610	0.14063	0.99812						-	calreticulin	calreticulin 1a	9.2e-127
estSNP00625	0.156136	0.998894		0.15772	1	1000	1.5271	9	myb family transcription factor	myb-like HTH transcriptional regulator family protein	3e-46
estSNP00649	0.131186	0.996977						2	uncharacterized loc101222863	Protein of unknown function (DUF1218)	9e-74
estSNP00686	0.155807	0.999116						-	glycerol-3-phosphate acyltransferase 3-like	glycerol-3-phosphate acyltransferase 9	0
estSNP00691	0.233365	0.999995		0.15829	1	1000	1.5251	-	tannin-related r2r3 myb transcription partial	myb domain protein 7	2.8e-77
estSNP00717	0.151578	0.999252						-	beta-galactosidase 17-like	beta-galactosidase 17	2.6e-84
estSNP00739	0.121117	0.995045						-	epidermal patterning factor-like protein	stomagen	6.8e-23
estSNP00743	0.137815	1						9	protein	Protein of unknown function (DUF3353)	1.9e-97
estSNP00751	0.13115	0.996172						-	annexin d1-like	annexin 1	0
estSNP00755	0.157473	0.999658		0.22214	1	1000	1.9702	-	-		-
estSNP00762	0.1361	0.99649						6	cytochrome c oxidase subunit mitochondrial-like isoform 2	cytochrome c oxidase-related	3.8e-47
estSNP00815				0.21102	1	1000	1.9222	-
estSNP00843	0.344438	0.999953		0.16435	1	1000	1.5848	10	thioredoxin-like 1- chloroplastic-like	atypical CYS HIS rich thioredoxin 4	4.6e-107
estSNP00882	0.132538	0.997765						7	bis(5 -adenosyl)-triphosphatase-like	FRAGILE HISTIDINE TRIAD	7.3e-68
estSNP00894	0.141829	0.996051						-	26s proteasome non-atpase regulatory subunit 8	regulatory particle non-ATPase 12A	5.1e-154
estSNP00959	0.204639	0.999897						-	probable protein phosphatase 2c 55-like	Protein phosphatase 2C family protein	3.4e-102
estSNP00971	0.127515	1						-	ethylene-dependent gravitropism-deficient and yellow-green-like 2 protein	ethylene-dependent gravitropism-deficient and yellow-green-like 2	0
estSNP01013	0.127087	0.995763						-	predicted protein	AT hook motif-containing protein	3.7e-71
estSNP01103	0.148753	0.999503						-	uncharacterized pkhd-type hydroxylase at1g22950-like	2-oxoglutarate (2OG) and Fe(II)-dependent oxygenase superfamily protein	7e-163
estSNP01127	0.200184	0.999941						-	zinc finger ccch domain-containing protein	HSP20-like chaperones superfamily protein	3e-69
estSNP01141	0.241309	0.999999		0.23943	1	1000	2.1089	-	e3 sumo-protein ligase mms21-like	RING/U-box superfamily protein	6.8e-65
estSNP01143	0.130276	0.996204						-	vacuolar protein sorting-associated protein vta1 homolog	hydroxyproline-rich glycoprotein family protein	1.1e-12
estSNP01206	0.120209	0.995796						-	leucine-rich repeat receptor-like serine threonine-protein kinase bam1-like	Leucine-rich receptor-like protein kinase family protein	3.7e-114
estSNP01232	0.150274	0.996546		0.17654	1	1000	1.6663	9	pdi-like protein	PDI-like 5-2	2.3e-158
estSNP01294	0.122838	0.999486						-	calcium binding protein	calmodulin like 42	8e-48
estSNP01295	0.134523	0.998135						10	zinc finger c3hc4 type domain containing protein	Transmembrane Fragile-X-F-associated protein	0
estSNP01316	0.127045	0.997313						-	40s ribosomal protein s30	Ribosomal protein S30 family protein	6.1e-25
estSNP01324	0.188841	0.999982		0.17368	1	1000	1.6438	2	nuclease s1	endonuclease 2	2.6e-114
estSNP01340	0.13453	0.995798						-	rubredoxin-like protein	Rubredoxin-like superfamily protein	4.8e-53
estSNP01370	0.194408	1						11	-		-
estSNP01392	0.122117	0.996127						-	ap-2 complex subunit sigma-like	SNARE-like superfamily protein	3.9e-93
estSNP01419	0.14709	0.999076						-	3fe-4s ferredoxin	DNAJ heat shock N-terminal domain-containing protein	0
estSNP01481	0.132997	0.996379						11	dna repair protein reca homolog mitochondrial-like	recA DNA recombination family protein	3.3e-118
estSNP01489	0.136789	0.999734						8	pfkb-type carbohydrate kinase family protein	pfkB-like carbohydrate kinase family protein	1.5e-95
estSNP01510	0.08944	1						-	hydrogen peroxide induced protein 1	unknown protein	2.3e-56
estSNP01539	0.318607	1		0.17523	1	1000	1.6736	-	alpha- -glucan-protein synthase	reversibly glycosylated polypeptide 1	0
estSNP01579	0.12251	0.996988						10	reticulon-like protein b22-like	Reticulon family protein	6.8e-98
estSNP01646	0.197661	0.999973		0.18794	1	1000	1.7659	-	universal stress protein a-like protein	Adenine nucleotide alpha hydrolases-like superfamily protein	6.2e-82
estSNP01648	0.195355	0.999921		0.15676	1	1000	1.5188	-	centromere protein o	chromosome segregation, cell division	4.6e-108
estSNP01690	0.137491	0.995671						-	translationally controlled tumor protein	translationally controlled tumor protein	3.1e-90
estSNP01736	0.178538	0.999557						3	structural constituent of of ribosome	Translation elongation	2.1e-51
estSNP01816	0.239745	0.999998		0.2068	1	1000	1.8934	-	protein abscisic acid-insensitive 5-like	Basic-leucine zipper (bZIP) transcription factor family protein	1.7e-38
estSNP01825	0.123281	0.995855		0.19899	1	1000	1.8249	6	60s ribosomal protein l23a-like	ribosomal protein L23AB	5.9e-52
estSNP01908	0.147943	0.99945						8	splicing arginine serine-rich 6	RNA-binding (RRM/RBD/RNP motifs) family protein with retrovirus zinc finger-like domain	3.4e-98
estSNP01913	0.225044	1		0.23591	1	1000	2.082	10	snf1-related protein kinase regulatory subunit beta-2-like	5'-AMP-activated protein kinase beta-2 subunit protein	1.1e-142
estSNP01933	0.149614	0.999675						6	cytochrome c oxidase subunit mitochondrial-like isoform 2	cytochrome c oxidase-related	5.8e-47
estSNP01963	0.219385	0.999998		0.21135	1	1000	1.9235	-	50s ribosomal protein l9	ribosomal protein L9	4.3e-46
estSNP01980	0.12957	0.997199						-	phospholipid n-methyltransferase	phospholipid N-methyltransferase	1.8e-80
estSNP02019	0.162742	0.999997		0.17188	0.9998	3.6988	1.6215	-	subtilisin-like protease-like	Proteinase inhibitor, propeptide	3.7e-43
estSNP02025	0.15633	0.999668		0.14704	0.9998	3.6988	1.4379	-	dag protein	plastid developmental protein DAG, putative	5.6e-64
estSNP02046	0.236494	1		0.14234	0.9996	3.3977	1.3899	2	rrna intron-encoded homing endonuclease	MLP-like protein 423	1.5e-16
estSNP02061	0.120086	0.997132						2	proteasome subunit beta type-3-b	20S proteasome beta subunit C2	3.9e-126
estSNP02073	0.149403	0.999513						10	kh domain-containing protein at4g18375-like	RNA-binding KH domain-containing protein	3.4e-119
estSNP02082	0.18278	1		0.1365	0.9994	3.2215	1.3454	-	uncharacterized loc101215174	Protein of unknown function, transmembrane-40	3.2e-119
estSNP02097	0.128818	0.99688						-	low molecular weight heat-shock protein	heat shock protein 17.4	9.3e-55
estSNP02103	0.14769	0.997953						-	ascorbate peroxidase	thylakoidal ascorbate peroxidase	0
estSNP02191				0.13776	0.9994	3.2215	1.3563	-		xyloglucan endotransglucosylase/hydrolase 8
estSNP02181	0.129181	0.997144						-	serine thronine protein	Protein kinase superfamily protein	0
estSNP02208	0.248571	0.999936		0.16629	0.9992	3.0965	1.5773	6	ap2 erf domain-containing transcription factor	ethylene response factor 104	7.4e-21
estSNP02216	0.11913	0.99642						-	atp-dependent clp protease proteolytic subunit chloroplastic-like	CLP protease P4	7.9e-100
estSNP02246	0.147995	1		0.13214	0.9992	3.0965	1.2996	4	transcription factor RF2b	Basic-leucine zipper (bZIP) transcription factor family protein	2.2e-148
estSNP02293	0.127881	0.998009						9	60s ribosomal protein l3-like	ribosomal protein 1	0
estSNP02344	0.129763	0.996478						7	bis(5 -adenosyl)-triphosphatase-like	FRAGILE HISTIDINE TRIAD	1.9e-67
estSNP02390	0.121192	0.997058						2	hypothetical protein	Protein of unknown function (DUF1218)	1e-71
estSNP02425	0.124265	0.995982						-	predicted protein	unknown protein	4.5e-64
estSNP02454	0.156159	0.999642						7	pinus taeda anonymous locus 0_14804_01 genomic sequence	Lactoylglutathione lyase / glyoxalase I family protein	5.1e-80
estSNP02482	0.250844	1						2	26s proteasome non-atpase regulatory subunit 6	26S proteasome, regulatory subunit Rpn7;Proteasome component (PCI) domain	0
estSNP02503	0.16892	1						7	mitochondrial carnitine acylcarnitine carrier-like isoform 1	Mitochondrial substrate carrier family protein	2.1e-113
estSNP02553	0.140514	0.997949		0.16348	0.9992	3.0965	1.5512	2	hypothetical protein		1.2e-33
estSNP02556	0.169458	0.999897						-	hypothetical protein	Protein of unknown function (DUF1682)	3.7e-29
estSNP02622	0.124205	0.996706		0.14147	0.999	2.9995	1.3832	5	exosome complex component csl4-like	Nucleic acid-binding, OB-fold-like protein	4.6e-109
estSNP02649	0.132501	0.997521						-	bis(5 -adenosyl)-triphosphatase-like	FRAGILE HISTIDINE TRIAD	2.9e-35
estSNP02779	0.120209	0.995796						-	leucine-rich repeat receptor-like serine threonine-protein kinase bam1-like	Leucine-rich receptor-like protein kinase family protein	0
estSNP02788	0.131019	0.998761						-	thioredoxin-like protein	WCRKC thioredoxin 1	4.2e-54
estSNP02882	0.241936	0.999953		0.1344	0.9986	2.8532	1.3211	2	hd domain-containing protein 2-like	Metal-dependent phosphohydrolase	5.4e-114
estSNP02901	0.150308	0.998267						-	probable ribonuclease p mrp protein subunit pop5-like	ribonuclease P family protein / Rpp14 family protein	4.3e-60
estSNP02905	0.122088	0.996358						-	ycf49-like protein	unknown protein	1.1e-70
estSNP02915	0.132959	0.999105						-	ascorbate peroxidase	ascorbate peroxidase 2	2.2e-112
estSNP02916				0.12971	0.9984	2.7951	1.2767	-		unknown protein
estSNP03018	0.121317	0.996136						3	glutathione s-transferase	glutathione S-transferase TAU 20	3.1e-79
estSNP03044	0.137103	0.995757						2	high chlorophyll fluorescence phenotype 173 protein	high chlorophyll fluorescence phenotype 173	0
estSNP03061	0.222395	0.999993		0.132	0.9976	2.6187	1.2958	-	isochorismatase hydrolase family protein	nicotinamidase 2	1.5e-86
estSNP03062	0.177185	1		0.15441	0.996	2.3961	1.4706	2	dnaj protein homolog	DNAJ homologue 3	0
gSNP00531				0.12562	0.996	2.3961	1.2367	3		Chaperone DnaJ-domain superfamily protein
gSNP00581	0.130693	0.998724						9	-		-
gSNP00860	0.162411	0.998822		0.14154	0.9956	2.3545	1.3741	6	-		-
gSNP00921	0.17144	1						-	gdsl esterase lipase	GDSL-like Lipase/Acylhydrolase superfamily protein	5.9e-33
gSNP01042	0.141531	0.998514		0.12777	0.9862	1.854	1.2478	10	protein ndr1-like	Late embryogenesis abundant (LEA) hydroxyproline-rich glycoprotein family	4e-26
gSNP01044	0.130595	0.997037						7	pinus taeda anonymous locus 0_14804_01 genomic sequence	Lactoylglutathione lyase / glyoxalase I family protein	8.4e-20
gSNP01079	0.135131	1		0.12171	0.9838	1.7833	1.1918	-	-	unknown protein 6	-
gSNP01300	0.131589	0.999075						-	probable salt tolerance-like protein at1g78600-like	light-regulated zinc finger protein 1	9.9e-64
gSNP01330	0.238232	0.999821		0.13571	0.9804	1.6991	1.3087	11	udp-galactose udp-glucose transporter 4-like	UDP-N-acetylglucosamine (UAA) transporter family	9e-51
gSNP01385	0.222765	0.999997		0.1175	0.9802	1.6946	1.1524	-	-	ABC-2 type transporter family protein	-
gSNP01491	0.158684	0.998455						1	mannosyl-oligosaccharide -alpha-mannosidase mns3-like	alpha-mannosidase 3	4.2e-93
gSNP01805	0.166309	0.999876		0.12299	0.98	1.6901	1.1976	11	glucan endo- -beta-glucosidase 3-like	O-Glycosyl hydrolases family 17 protein	4.4e-77
gSNP01835	0.114316	0.995893						10	-	Domain of unknown function (DUF298)	-
gSNP01839	0.228523	0.997458						-	-		-
gSNP02059	0.13551	0.996448						-	aldo-keto reductase yakc	NAD(P)-linked oxidoreductase superfamily protein	4.7e-68
gSNP02447	0.147888	0.99673						-	amidophosphoribosyltransferase chloroplastic-like		7.7e-05
gSNP02637	0.124803	0.998057						-	para-aminobenzoate synthase-like	para-aminobenzoate (PABA) synthase family protein	9.7e-24
gSNP02675	0.11615	0.995452						3	glucan endo- -beta-glucosidase	O-Glycosyl hydrolases family 17 protein	1e-62
gSNP02739	0.113099	0.995258						-	auxin efflux carrier component	Auxin efflux carrier family protein	9.8e-41
gSNP02822	0.172498	0.998558		0.12486	0.9766	1.6204	1.2146	11	methyltransferase-like protein 13-like	S-adenosyl-L-methionine-dependent methyltransferases superfamily protein	3e-22
gSNP02882	0.18881	0.999933		0.12369	0.9758	1.6055	1.2087	2	synaptonemal complex protein 1-like	Myosin heavy chain-related protein	2e-25
gSNP02884	0.136456	0.998596						-	-		-
gSNP03082	0.1574	0.999684		0.13459	0.97439	1.5804	1.2964	2	-		-
gSNP03195	0.155832	1		0.12297	0.97419	1.5769	1.1998	-	btb poz domain-containing protein at3g05675-like	BTB/POZ domain-containing protein	2.7e-101
gSNP03273	0.157892	0.998974						11	disease resistance protein at4g27190-like	Glycosyl hydrolase superfamily protein	7.9e-38
gSNP03565	0.134199	0.996636						-	histone h4		0.00025
gSNP03578	0.13818	0.999582						-	2-hydroxyacid dehydrongenase	Erythronate-4-phosphate dehydrogenase family protein	2.4e-24
gSNP03744	0.137589	1		0.12123	0.97379	1.5701	1.1851	-	-		-
gSNP03769	0.126248	0.998147						7	g-type lectin s-receptor-like serine threonine-protein kinase rlk1-like	receptor-like protein kinase 1	4.8e-20
gSNP03850	0.237409	0.999999		0.12213	0.97259	1.5501	1.1902	-	-	Ubiquitin-like superfamily protein	-
gSNP03910	0.210935	0.999998						3	endoglucanase 17-like	glycosyl hydrolase 9B1	2.6e-67
gSNP04024	0.255582	0.999997		0.11784	0.97039	1.5156	1.1489	11	myb transcription factor	myb domain protein 5	7.8e-57
gSNP04111	0.144836	0.999067						2	-		-
gSNP04166	0.146012	0.999474		0.12033	0.96919	1.4978	1.1702	-	-		-
gSNP04215	0.540111	1						7	endo- -beta-glucanase	glycosyl hydrolase 9C3	5.8e-95
gSNP04244	0.110075	0.995114						2	major facilitator protein	Major facilitator superfamily protein	1e-44
gSNP04392	0.172775	0.998217						-	dna-damage-repair toleration protein drt100-like	Leucine-rich repeat (LRR) family protein	2.2e-35
gSNP04480	0.163159	0.999924		0.12826	0.96899	1.4949	1.2421	11	glucan endo- -beta-glucosidase 2-like	O-Glycosyl hydrolases family 17 protein	3.2e-58
gSNP04589	0.169976	0.999976						2	hypothetical protein	Protein of unknown function (DUF3537)	2e-41
gSNP04607	0.194711	0.999898		0.15138	0.96799	1.4806	1.4202	-	-		-
gSNP04667	0.116559	0.995507						1	-		-
gSNP04808	0.212334	0.99996						3	protein	Leucine-rich receptor-like protein kinase family protein	1.1e-42
gSNP05180	0.10921	0.996196						1	f-box-like protein	Galactose oxidase/kelch repeat superfamily protein	1.5e-68
gSNP05191				0.11524	0.96339	1.4202	1.1221	2		RING/U-box superfamily protein
gSNP05257	0.127809	0.998801						4	proteasome subunit alpha type-1-a-like	proteasome alpha subunit F1	7.6e-38
gSNP05269	0.13421	0.995542						10	-	Protein phosphatase 2C family protein	-
gSNP05302	0.131455	0.999027						-	dead-box atp-dependent rna helicase 36-like	RNA helicase 36	3e-77
gSNP05311	0.120228	0.997417						5	probable carboxylesterase 6-like	alpha/beta-Hydrolases superfamily protein	3.9e-103
gSNP05415	0.138086	0.997558						1	4-coumarate-- ligase-like 1-like	acyl-CoA synthetase 5	1.5e-27
gSNP05463	0.156098	0.999531						2	myb dna binding protein	Nucleotide-diphospho-sugar transferase family protein	5.9e-73
gSNP05881	0.153408	0.99941		0.14104	0.96039	1.3847	1.3385	-	abc transporter g family member 3-like	ABC-2 type transporter family protein	2.6e-43
gSNP05988	0.410923	0.999948						10	aspartic proteinase nepenthesin-1-like	Eukaryotic aspartyl protease family protein	1.7e-30
gSNP06020	0.113226	0.996427						-	-	tubby like protein 7	-
gSNP06141	0.128164	1		0.11331	0.95939	1.3734	1.1023	-	-	BTB/POZ domain-containing protein	-
gSNP06191				0.12006	0.95619	1.339	1.1622	-		GDSL-like Lipase/Acylhydrolase superfamily protein
gSNP06309	0.14586	0.998117		0.12823	0.95519	1.3287	1.2315	-	pinus taeda anonymous locus 0_14423_02 genomic sequence	UDP-glucosyl transferase 89B1	4.5e-47
gSNP06508	0.130017	0.998029						-	ethylene-responsive element binding factor-like protein	ethylene responsive element binding factor 3	4.1e-23
gSNP06561	0.133235	0.997823						1	cationic amino acid transporter	cationic amino acid transporter 5	3.6e-57
gSNP06599	0.137308	0.996216		0.1227	0.95499	1.3267	1.1878	2	-	Protein of unknown function (DUF1639)	-
gSNP06715	0.206897	0.998382						6	protein	Protein of unknown function (DUF1644)	6.7e-33
gSNP06850	0.244954	1		0.11995	0.95199	1.2973	1.162	10	-		-
gSNP06867	0.241379	0.998021						7	beta-glucosidase-like sfr2	Glycosyl hydrolase superfamily protein	4.3e-62
gSNP07098	0.266653	0.999707						7	cinnamoyl- reductase	NAD(P)-binding Rossmann-fold superfamily protein	5.3e-129
gSNP07121	0.469412	1		0.14706	0.94879	1.2678	1.3822	-	-		-
gSNP07128	0.136027	0.998389		0.11859	0.94439	1.23	1.1433	-	diaminopimelate chloroplastic-like	diaminopimelate epimerase family protein	2.8e-50
gSNP07161	0.139995	0.999801						-	probable carboxylesterase 18-like	carboxyesterase 18	1e-39
gSNP07270	0.129743	0.995476						11	-	extra-large GTP-binding protein 3	-
gSNP07691	0.162319	0.999966		0.11098	0.94219	1.2121	1.0729	-	dead-box atp-dependent rna helicase 32-like	DEA(D/H)-box RNA helicase family protein	8.2e-27
gSNP07777	0.279638	1		0.11353	0.94179	1.2089	1.0982	5	-		-
gSNP07880				0.12217	0.94039	1.198	1.1713	3		Class-II DAHP synthetase family protein
gSNP07948	0.259924	0.999999						7	ankyrin repeat-containing	Ankyrin repeat family protein	2.6e-67
gSNP07996	0.146693	0.997942						6	dna-binding protein rhl1	root hair initiation protein root hairless 1 (RHL1)	5.8e-41
gSNP08373	0.18567	0.999933						-	hypothetical protein		3.6e-25
gSNP08408	0.120938	1						-	sphingoid long-chain bases kinase 1-like	long-chain base (LCB) kinase 1	3.9e-63
gSNP08515	0.254559	0.999999						-	pentatricopeptide repeat-containing protein at4g33170-like	CTC-interacting domain 7	4.1e-99
gSNP08830	0.202152	0.999949						-	calcium binding protein		8.8e-25
gSNP08900	0.197532	0.999982		0.1106	0.93839	1.1827	1.0685	-	-		-
gSNP09003	0.167995	0.99926		0.10902	0.93739	1.1753	1.0542	8	-		-
gSNP09193	0.37931	1						11	-	glutamate-cysteine ligase	-
gSNP09226	0.212805	0.999252						-	-		-
gSNP09244	0.220521	0.999975						-	hypothetical protein	Plant protein of unknown function (DUF247)	1.3e-16
gSNP09342	0.268944	0.999984		0.11347	0.93579	1.1636	1.0939	10	-	Protein kinase superfamily protein	-
gSNP09446	0.190655	0.999993						-	-		-
gSNP09455	0.231132	0.999984						8	-		-
gSNP09531	0.232684	0.999999		0.10496	0.93499	1.1578	1.011	3	-	Putative adipose-regulatory protein (Seipin)	-
gSNP09674	0.17248	0.999536		0.11133	0.93199	1.1368	1.0727	9	leucine-rich repeat protein kinase-like protein	Leucine-rich repeat protein kinase family protein	1.4e-16
gSNP11710				0.11544	0.92579	1.096	1.1078	5		unknown protein
gSNP11743	0.37437	0.999993						4	alpha-glucan water chloroplastic-like	Pyruvate phosphate dikinase, PEP/pyruvate binding domain	3.2e-47
gSNP11760	0.148186	0.999968		0.10223	0.92258	1.0762	0.97745	7	abscisic acid stress ripening-related protein		2.6e-11
gSNP11820	0.136872	0.997937						-	tannin-related r2r3 myb transcription partial	myb domain protein 3	1.2e-69
gSNP11821	0.132755	0.998665						-	ethylene-responsive element binding factor-like protein	ethylene responsive element binding factor 3	2.6e-25
gSNP11856				0.11561	0.91318	1.022	1.1033	-		xyloglucan endotransglucosylase/hydrolase 8
gSNP11860	0.157107	0.999737		0.12036	0.90998	1.0047	1.1465	4	3-ketoacyl- synthase 4-like	3-ketoacyl-CoA synthase 4	8.6e-90
gSNP11876	0.154889	0.999611						-	unknown [Picea sitchensis]		0.00043
gSNP11900	0.15751	0.998879		0.11087	0.90958	1.0026	1.0578	11	scarecrow-like protein 1-like	SCARECROW-like 1	5.4e-87
gSNP11946	0.131589	0.999075						-	probable salt tolerance-like protein at1g78600-like	light-regulated zinc finger protein 1	9.9e-64
gSNP11971	0.134128	0.999223						-	-		-
