# Supplementary material for: Genetic Differentiation and Evolutionary Adaptation in Cryptomeria japonica
Source: G3 (Bethesda). 2014 Oct 14;4(12):2389–402. doi: 10.1534/g3.114.013896 (PMC4267934; doi:10.1534/g3.114.013896)
Supplement: Supporting Information [file supp_g3.114.013896_TableS2.xlsx]

## Sheet: SupplementalTable#2
Supplemental table 2. Outlier loci detected in each variety group
	Lositan		Arlequin	Bayscan
	Omote-sugi	Ura-sugi		Omote-sugi	Ura-sugi
estSNP00015				1
estSNP00023	1
estSNP00047			1
estSNP00049		1
estSNP00064			1
estSNP00069		1
estSNP00073			1
estSNP00089		1
estSNP00091			1
estSNP00110			1
estSNP00146	1		1
estSNP00168		1
estSNP00178	1			1
estSNP00188		1
estSNP00195		1
estSNP00213	1			1
estSNP00220		1
estSNP00237			1
estSNP00242		1
estSNP00247		1
estSNP00249		1
estSNP00292		1
estSNP00298		1
estSNP00322		1
estSNP00328		1	1		1
estSNP00338		1
estSNP00387		1
estSNP00402		1	1
estSNP00407			1
estSNP00425		1
estSNP00428		1			1
estSNP00438	1		1	1
estSNP00443			1
estSNP00454			1
estSNP00460			1
estSNP00491		1	1
estSNP00547		1
estSNP00552		1
estSNP00558			1
estSNP00609			1
estSNP00625			1
estSNP00647		1
estSNP00649		1			1
estSNP00661				1
estSNP00670	1
estSNP00685		1
estSNP00686	1
estSNP00691	1	1	1
estSNP00712			1
estSNP00739			1
estSNP00743			1
estSNP00755		1	1		1
estSNP00758			1
estSNP00806		1
estSNP00817		1
estSNP00825	1
estSNP00843	1		1	1
estSNP00877			1
estSNP00882		1
estSNP00890	1			1
estSNP00906	1
estSNP00937			1
estSNP00959	1		1
estSNP00971	1
estSNP01027		1
estSNP01052		1
estSNP01076		1
estSNP01080		1
estSNP01102			1
estSNP01103			1
estSNP01112		1
estSNP01127		1
estSNP01141			1
estSNP01143	1
estSNP01170		1
estSNP01203		1
estSNP01206
estSNP01232
estSNP01234	1
estSNP01275		1
estSNP01324			1
estSNP01340			1
estSNP01365			1
estSNP01368		1			1
estSNP01370		1
estSNP01378	1
estSNP01419		1			1
estSNP01446	1
estSNP01478		1
estSNP01481			1
estSNP01489		1			1
estSNP01492		1
estSNP01511		1			1
estSNP01539			1
estSNP01579			1
estSNP01592		1			1
estSNP01616		1
estSNP01646			1
estSNP01648			1
estSNP01736			1
estSNP01750		1
estSNP01762		1
estSNP01800		1
estSNP01816			1
estSNP01825		1			1
estSNP01913			1
estSNP01919		1
estSNP01933			1
estSNP01937		1
estSNP01963		1	1
estSNP01980			1
estSNP02017	1
estSNP02019			1
estSNP02025		1	1		1
estSNP02046	1		1
estSNP02061		1
estSNP02070		1
estSNP02076		1
estSNP02082			1
estSNP02097		1
estSNP02103		1
estSNP02163		1
estSNP02208			1
estSNP02216			1
estSNP02246		1
estSNP02249	1
estSNP02265	1
estSNP02266		1
estSNP02334			1
estSNP02344		1
estSNP02346		1			1
estSNP02356			1
estSNP02454			1
estSNP02374		1
estSNP02482			1
estSNP02395		1
estSNP02454	1		1
estSNP02470		1
estSNP02482	1	1	1		1
estSNP02503		1
estSNP02509		1
estSNP02525		1
estSNP02553			1
estSNP02556		1
estSNP02607	1			1
estSNP02619	1
estSNP02564			1
estSNP02622			1
estSNP02648		1
estSNP02649		1
estSNP02669		1
estSNP02760	1
estSNP02779			1
estSNP02788			1
estSNP02825				1
estSNP02852	1
estSNP02869		1
estSNP02882	1		1
estSNP02901			1
estSNP02905			1
estSNP02915	1
estSNP02916			1
estSNP02976		1
estSNP03018		1
estSNP03044		1			1
estSNP03061		1	1
estSNP03062			1
gSNP00044		1
gSNP00066	1		1
gSNP00140	1
gSNP00161		1
gSNP00236		1
gSNP00452		1
gSNP00504		1
gSNP00517		1
gSNP00581		1
gSNP00660		1
gSNP00718		1
gSNP00860			1
gSNP00892	1
gSNP00921	1			1
gSNP00944		1
gSNP00973		1
gSNP01042			1
gSNP01049		1
gSNP01079		1			1
gSNP01172	1
gSNP01300	1
gSNP01330			1
gSNP01385			1
gSNP01589		1
gSNP01641		1
gSNP01805			1
gSNP01833		1
gSNP01839	1	1	1
gSNP01861		1
gSNP01871		1
gSNP01899		1
gSNP01953			1
gSNP02059		1
gSNP02148		1
gSNP02235	1
gSNP02256			1
gSNP02277		1
gSNP02447		1
gSNP02495	1		1
gSNP02637			1
gSNP02671		1
gSNP02706			1
gSNP02822			1
gSNP02882			1
gSNP02929		1
gSNP02982		1
gSNP03025	1
gSNP03082			1
gSNP03195			1
gSNP03226			1
gSNP03273		1
gSNP03482		1
gSNP03565			1
gSNP03715	1
gSNP03744			1
gSNP03769			1
gSNP03850	1	1	1		1
gSNP03910			1
gSNP03966		1
gSNP04024	1		1
gSNP04111	1
gSNP04215	1		1
gSNP04280	1
gSNP04392	1		1
gSNP04411		1
gSNP04480			1
gSNP04589			1
gSNP04607		1	1
gSNP04668		1
gSNP04760	1
gSNP04808	1		1
gSNP04896		1
gSNP05257		1
gSNP05269			1
gSNP05311		1
gSNP05366	1
gSNP05415		1
gSNP05574			1
gSNP05667		1
gSNP05722		1
gSNP05756		1
gSNP05881			1
gSNP05988	1		1
gSNP06012	1
gSNP06020		1
gSNP06023		1
gSNP06141			1
gSNP06253		1
gSNP06309	1			1
gSNP06312		1
gSNP06508			1
gSNP06544		1
gSNP06561		1			1
gSNP06599			1
gSNP06620		1
gSNP06625		1
gSNP06715			1
gSNP06850			1
gSNP06867			1
gSNP06881		1
gSNP06927		1
gSNP06966					1
gSNP07070					1
gSNP07081		1
gSNP07098		1
gSNP07121		1	1		1
gSNP07128		1			1
gSNP07161	1			1
gSNP07270			1
gSNP07354		1
gSNP07691			1
gSNP07777	1		1	1
gSNP07880			1
gSNP07932	1
gSNP07948	1		1
gSNP07996			1
gSNP08373	1		1
gSNP08515	1		1
gSNP08553		1
gSNP08560	1
gSNP08830		1
gSNP08900		1	1
gSNP08978		1
gSNP08985		1
gSNP09003		1	1		1
gSNP09193	1		1
gSNP09226		1
gSNP09244		1
gSNP09301		1
gSNP09342			1
gSNP09413	1
gSNP09446		1	1		1
gSNP09455	1		1
gSNP09630		1
gSNP09531			1
gSNP09674			1
gSNP09683		1
gSNP11710			1
gSNP11731	1
gSNP11743	1		1
gSNP11760	1			1
gSNP11782	1
gSNP11813	1
gSNP11821			1
gSNP11837		1
gSNP11868				1
gSNP11860			1
gSNP11876			1
gSNP11900			1
gSNP11903			1
gSNP11919		1
gSNP11927		1
gSNP11930	1
gSNP11946	1
gSNP11971		1
gSNP11975		1
	70	155	131	15	23
