# Supplementary material for: Genetic Differentiation and Evolutionary Adaptation in Cryptomeria japonica
Source: G3 (Bethesda). 2014 Oct 14;4(12):2389–402. doi: 10.1534/g3.114.013896 (PMC4267934; doi:10.1534/g3.114.013896)
Supplement: Supporting Information [file supp_g3.114.013896_TableS3.xlsx]

## Sheet: SupplementalTable#3
Supplemental table 3. The results of Principal Component Analysis (PCA) of environmental variables.
Environment data	Current				LIG				MIROC
	PC1	PC2	PC3		PC1	PC2	PC3		PC1	PC2	PC3
Latitude	0.300911	0.0272869	0.113698		-0.286242	0.0413238	0.0952102		0.294551	0.0248156	0.155238
Longitude	0.266917	-0.113369	-0.0481896		0.149914	-0.421338	-0.0205132		0.248789	0.172161	0.0662688
Bio01	-0.172403	-0.373094	0.051744		-0.200489	-0.0717737	-0.0176911		-0.257733	0.255762	0.0850494
Bio02	0.200268	-0.0461632	-0.142358		0.0432857	-0.273235	0.0147758		0.166203	-0.122332	-0.294866
Bio03	-0.0825017	-0.199554	-0.16302		-0.27664	0.175608	0.0510689		-0.163746	-0.0713145	-0.229431
Bio04	0.282498	0.168298	0.0267543		-0.176698	-0.334372	0.0947587		0.291466	-0.107331	-0.0516801
Bio05	0.172952	-0.326657	0.140282		0.214451	-0.329274	0.0473381		0.0434503	0.321668	0.187428
Bio06	-0.220904	-0.29355	0.13148		-0.279464	0.10986	0.00881372		-0.266647	0.195943	0.181487
Bio07	0.296238	0.103315	-0.0494183		0.0303074	-0.0761419	-0.356927		0.288481	-0.0916099	-0.122472
Bio08	0.134101	-0.369868	0.0442217		0.0690657	-0.256424	0.296461		-0.0630863	0.209252	-0.208757
Bio09	-0.0749701	-0.147663	0.401235		-0.0900094	-0.421171	0.0576763		-0.137518	0.0563269	0.431797
Bio10	0.000154	-0.419156	0.114537		0.207751	-0.356943	-0.0155189		-0.159783	0.350178	0.138514
Bio11	-0.213471	-0.328262	0.043372		0.299449	0.0498987	-0.0238583		-0.270636	0.216878	0.0982962
Bio12	-0.309689	0.0683851	-0.0123394		0.294129	0.0944805	-0.107831		-0.283286	-0.191866	-0.0459184
Bio13	-0.310206	0.0953217	-0.0736747		0.246732	0.11979	0.275525		-0.284994	-0.168501	-0.124422
Bio14	-0.100222	0.17511	0.425016		0.156123	0.000310862	-0.496538		-0.0696104	-0.365627	0.281751
Bio15	-0.21443	-0.0139567	-0.383541		0.290486	0.103692	-0.117519		-0.207393	0.0911819	-0.390742
Bio16	-0.297909	0.113349	-0.106044		0.228834	0.115301	0.37109		-0.271151	-0.173244	-0.159161
Bio17	-0.152374	0.17185	0.382825		0.269165	0.144177	-0.199826		-0.118999	-0.353798	0.248752
Bio18	-0.283446	0.0997427	-0.149081		0.164337	0.131087	0.473392		-0.260763	-0.154266	-0.191959
Bio19	-0.075204	0.185398	0.451458		-0.259025	-0.117033	-0.0837496		-0.0514151	-0.345971	0.326141
Standard deviation	3.07841	2.24576	1.89027		3.20352	2.06393	1.60464		3.11992	2.20293	1.78025
Proportion of Variance	0.451267	0.240164	0.170148		0.488694	0.202848	0.122613		0.463519	0.23109	0.150919
Cumulative Proportion	0.451267	0.691431	0.861579		0.488694	0.691542	0.814155		0.463519	0.694609	0.845527
BIO1 = Annual Mean Temperature BIO2 = Mean Diurnal Range (Mean of monthly (max temp - min temp)) BIO3 = Isothermality (BIO2/BIO7) (* 100) BIO4 = Temperature Seasonality (standard deviation *100) BIO5 = Max Temperature of Warmest Month BIO6 = Min Temperature of Coldest Month BIO7 = Temperature Annual Range (BIO5-BIO6) BIO8 = Mean Temperature of Wettest Quarter BIO9 = Mean Temperature of Driest Qua…
